# Supplementary material for: Application of the iBox prognostication system as a surrogate endpoint in the TRANSFORM randomised controlled trial: proof-of-concept study
Source: PubMed Central journal article supplement — BMJ Open. 2021 Oct 7;11(10):e052138. doi: 10.1136/bmjopen-2021-052138 (PMC8499283; doi:10.1136/bmjopen-2021-052138), 2021-10-07
Supplement: bmjopen-2021-052138supp001.pdf [file bmjopen-2021-052138supp001.pdf]

## **SUPPLEMENTAL MATERIAL**

### **Table of Contents**

Supplemental Methods. List of the R packages.

Supplemental Table 1. Histological diagnosis at 1 year after randomization.

Supplemental Figure 1. eGFR at 1 year after randomization

Supplemental Figure 2. UPCR at 1 year after randomization

Supplemental Figure 3. iBox<sup>#1</sup> scores at 1 year after randomization and projected allograft survival for living donors

Supplemental Figure 4. iBox<sup>#1</sup> scores at 1 year after randomization and projected allograft survival for deceased donors

Supplemental Figure 5. iBox<sup>#1</sup> scores at 2 year after randomization and projected allograft survival

List of Independent Ethics Committees (IECs) or Institutional Review Boards (IRBs) from the TRANSFORM study

**Supplemental Methods.** List of the R packages.

The R packages used for this study:

- **survival:** <https://cran.r-project.org/package=survival>
- **pec:** <https://cran.r-project.org/package=pec>
- **ggplot2:** <https://cran.r-project.org/package=ggplot2>
- **ggthemes:** <https://cran.r-project.org/package=ggthemes>
- **devtools:** <https://cran.r-project.org/package=devtools>
- **yarr:** <https://cran.r-project.org/package=yarr>

**Supplemental Table 1.** Histological diagnosis at 1 year after randomization

| Histological parameters, n (%) | EVR+rCNI   | MPA+sCNI   | P value |
|--------------------------------|------------|------------|---------|
|                                | N = 345    | N = 361    |         |
| Active ABMR                    | 62 (18.0)  | 52 (14.4)  | 0.198   |
| Chronic AMR                    | 6 (1.74)   | 11 (3.05)  | 0.257   |
| TCMR                           | 61 (17.68) | 57 (15.79) | 0.501   |
| Borderline rejection           | 42 (12.17) | 35 (9.69)  | 0.291   |
| BK virus nephropathy           | 8 (2.32)   | 10 (2.78)  | 0.704   |
| Nephropathy recurrence         | 8 (2.32)   | 4 (1.11)   | 0.213   |

ABMR, antibody-mediated rejection; EVR, everolimus; MPA, mycophenolic acid; rCNI, reduced-exposure calcineurin inhibitor; sCNI, standard-exposure calcineurin inhibitor; TCMR, T-cell mediated rejection

**Supplemental Figure 1. eGFR at 1 year after randomization**

Mean eGFR in the EVR+rCNI arm (blue) and MPA+sCNI arm (pink;  $P = 0.4864$  for the comparison of mean eGFR between arms.

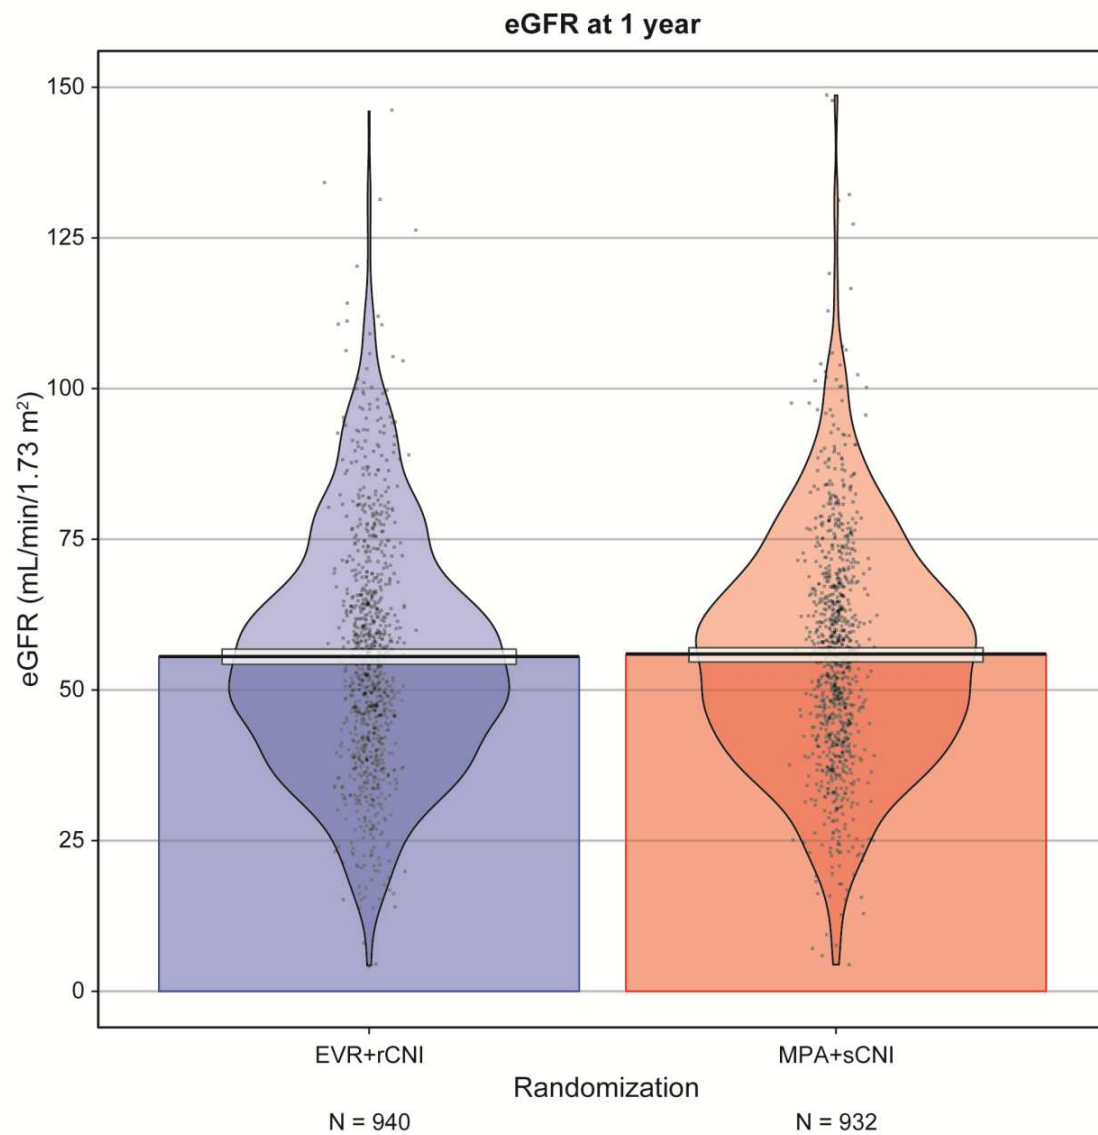

eGFR, estimated glomerular filtration rate; EVR, everolimus; MPA, mycophenolic acid;

rCNI, reduced-exposure calcineurin inhibitor; sCNI, standard-exposure calcineurin inhibitor

**Supplemental Figure 2. UPCR at 1 year after randomization**

Mean UPCR in the EVR+rCNI arm (blue) and the MPA -CNI arm (pink).  $P = 0.0133$  for the

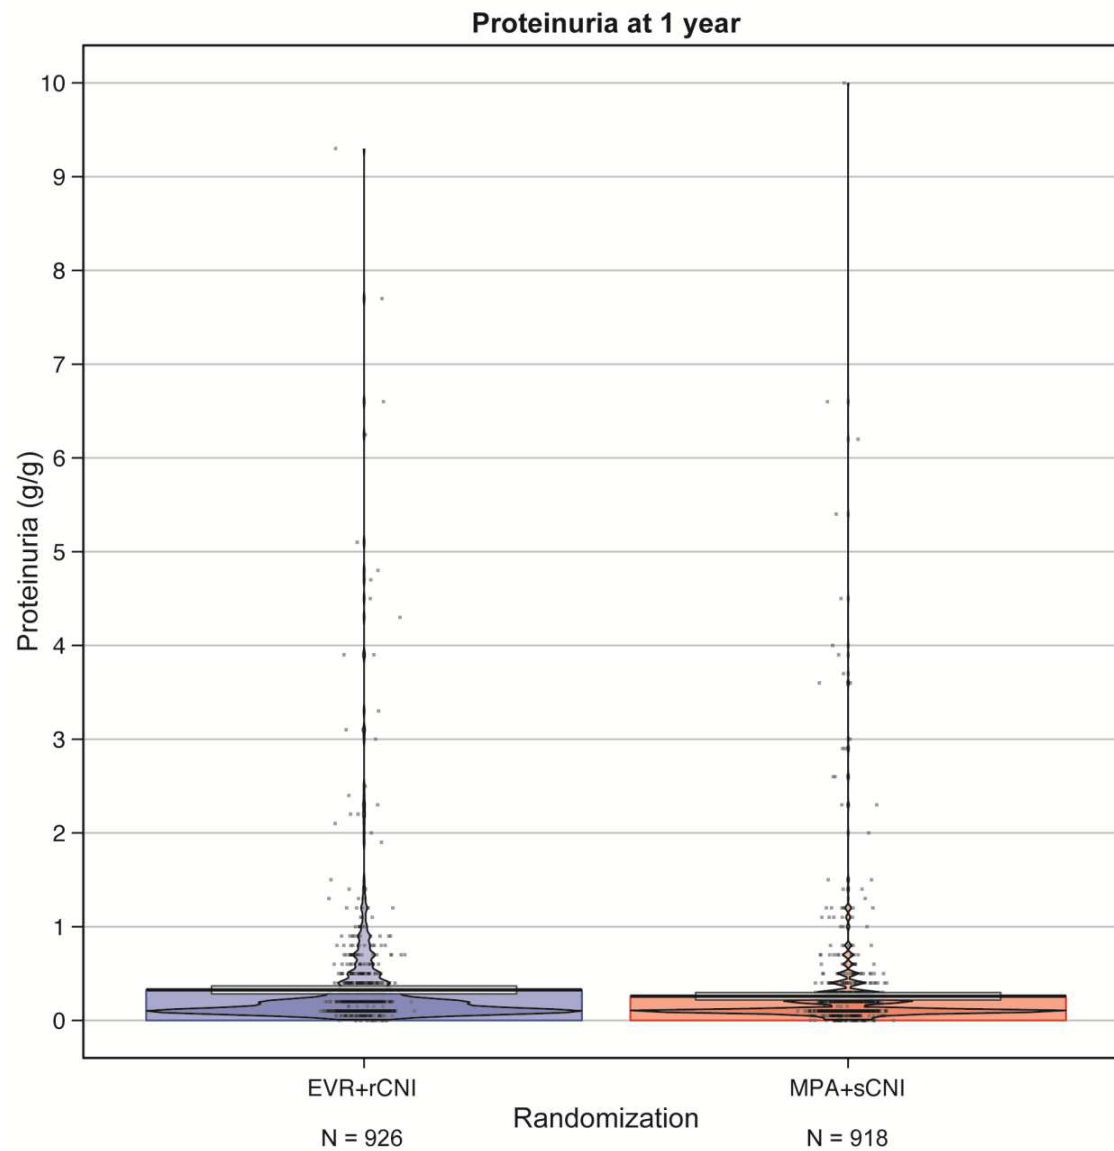

comparison of mean UPCR between arms.

EVR, everolimus; MPA, mycophenolic acid; rCNI, reduced-exposure calcineurin inhibitor;

sCNI, standard-exposure calcineurin inhibitor; UPCR, urinary protein creatinine ratio

### Supplementary Figure 3: iBox<sup>#1</sup> scores at 1 year after randomization and projected allograft survival for living donors

A) Mean iBox<sup>#1</sup> scores in the EVR+rCNI and MPA+sCNI arms at 1 year for living donors.

B) Projected allograft survival in EVR+rCNI arm (blue line) and MPA+sCNI arm (red line) for living donors. The black dotted line corresponds to the 10% inferiority margin. The duration of TRANSFORM is the time between randomization and the last follow-up of the patients involved in the TRANSFORM study (1 year post-randomization). The projected kidney allograft survival takes into account the event (death censored graft loss) that occurred during the duration of TRANSFORM study. EVR, everolimus, MPA, mycophenolic acid; rCNI, reduced-exposure calcineurin inhibitor; sCNI, standard-exposure calcineurin inhibitor.

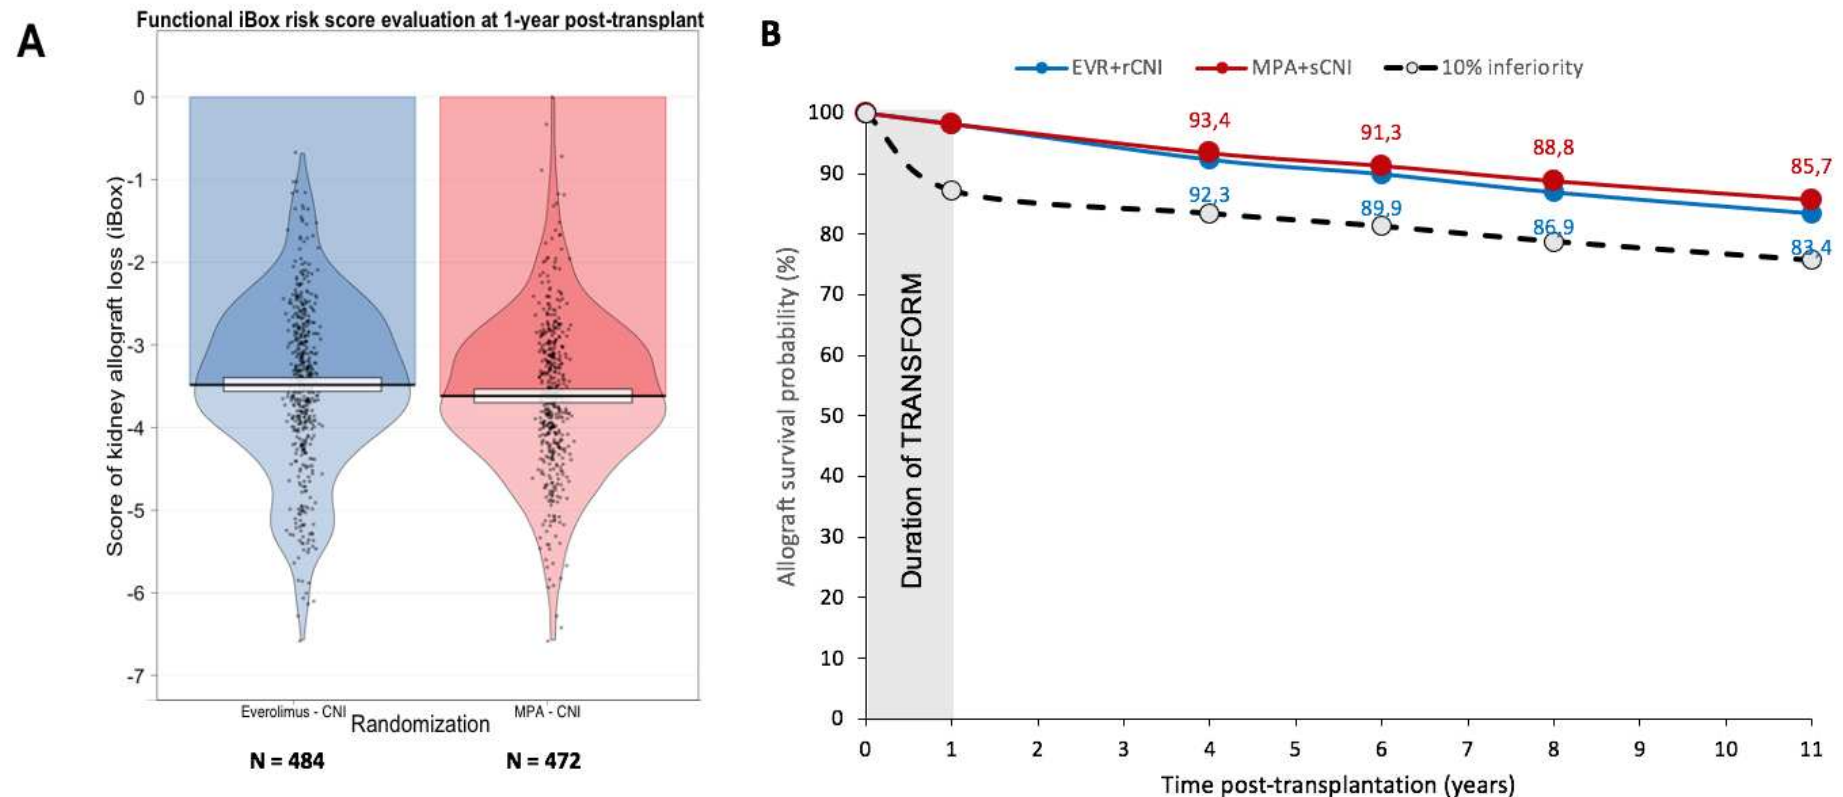

### Supplementary Figure 4: iBox<sup>#1</sup> scores at 1 year after randomization and projected allograft survival for deceased donors

A) Mean iBox<sup>#1</sup> scores in the EVR+rCNI and MPA+sCNI arms at 1 year for deceased donors.

B) Projected allograft survival in EVR+rCNI arm (blue line) and MPA+sCNI arm (red line) for deceased donors. The black dotted line corresponds to the 10% inferiority margin. The duration of TRANSFORM is the time between randomization and the last follow-up of the patients involved in the TRANSFORM study (1 year post-randomization). The projected kidney allograft survival takes into account the event (death censored graft loss) that occurred during the duration of TRANSFORM study. EVR, everolimus, MPA, mycophenolic acid; rCNI, reduced-exposure calcineurin inhibitor; sCNI, standard-exposure calcineurin inhibitor.

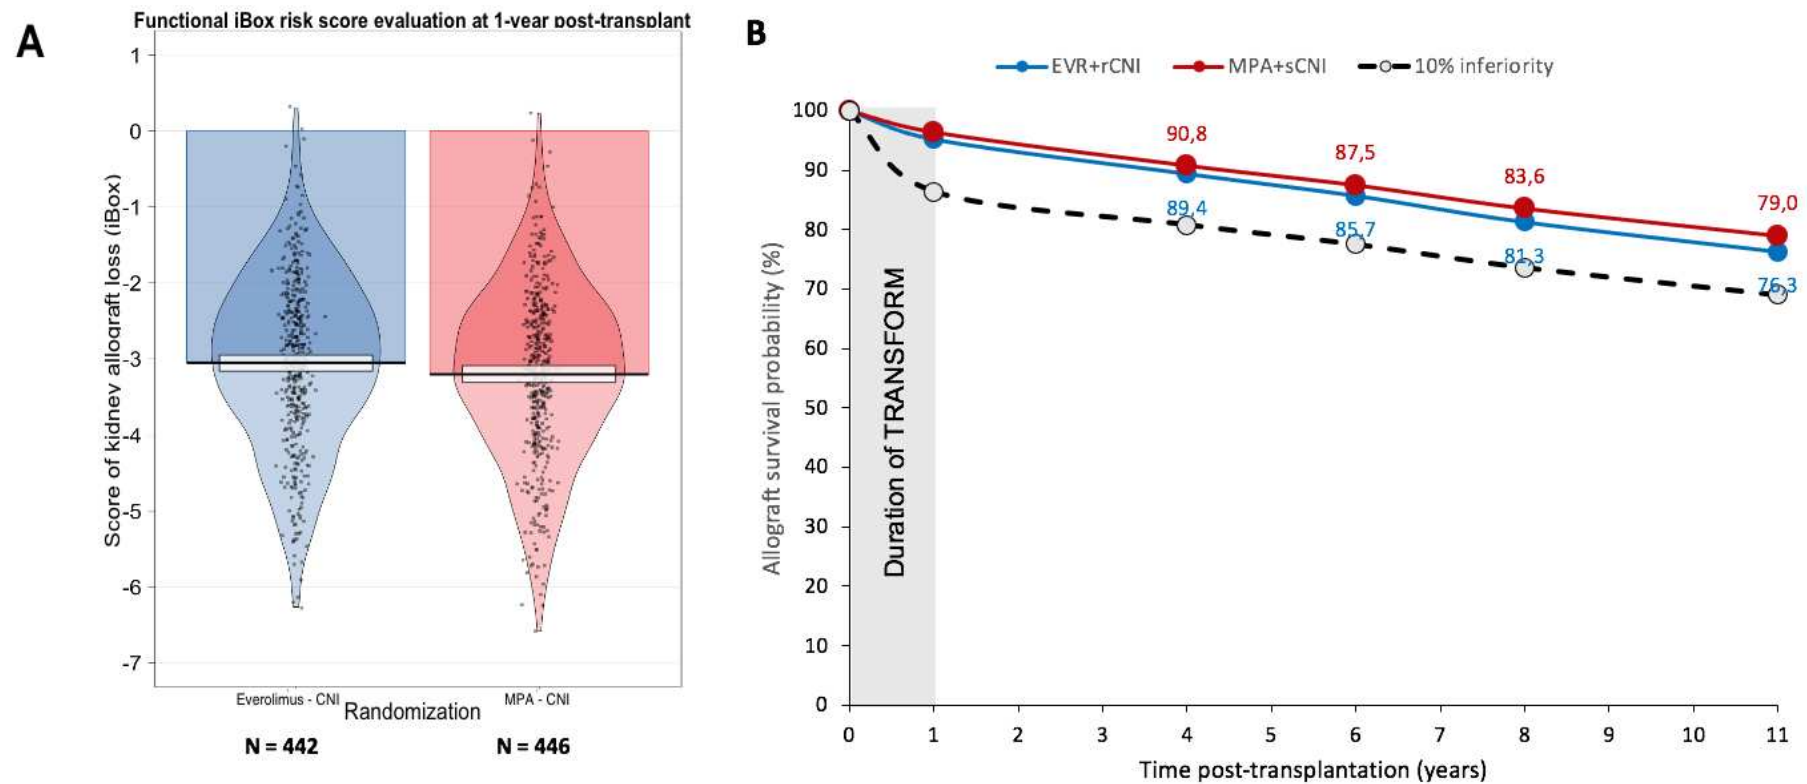

### Supplemental Figure 5. iBox<sup>#1</sup> scores at 2 year after randomization and projected allograft survival

A) Mean iBox<sup>#1</sup> scores in the EVR+rCNI and MPA+sCNI arms at 2 year.

B) Projected allograft survival in EVR+rCNI arm (blue line) and MPA+sCNI arm (red line). The black dotted line corresponds to the 10% inferiority margin. The duration of TRANSFORM is the time between randomization and the last follow-up of the patients involved in the TRANSFORM study (2 years post-randomization). The projected kidney allograft survival takes into account the event (death censored graft loss) that occurred during the duration of TRANSFORM study. EVR, everolimus, MPA, mycophenolic acid; rCNI, reduced-exposure calcineurin inhibitor; sCNI, standard-exposure calcineurin inhibitor.

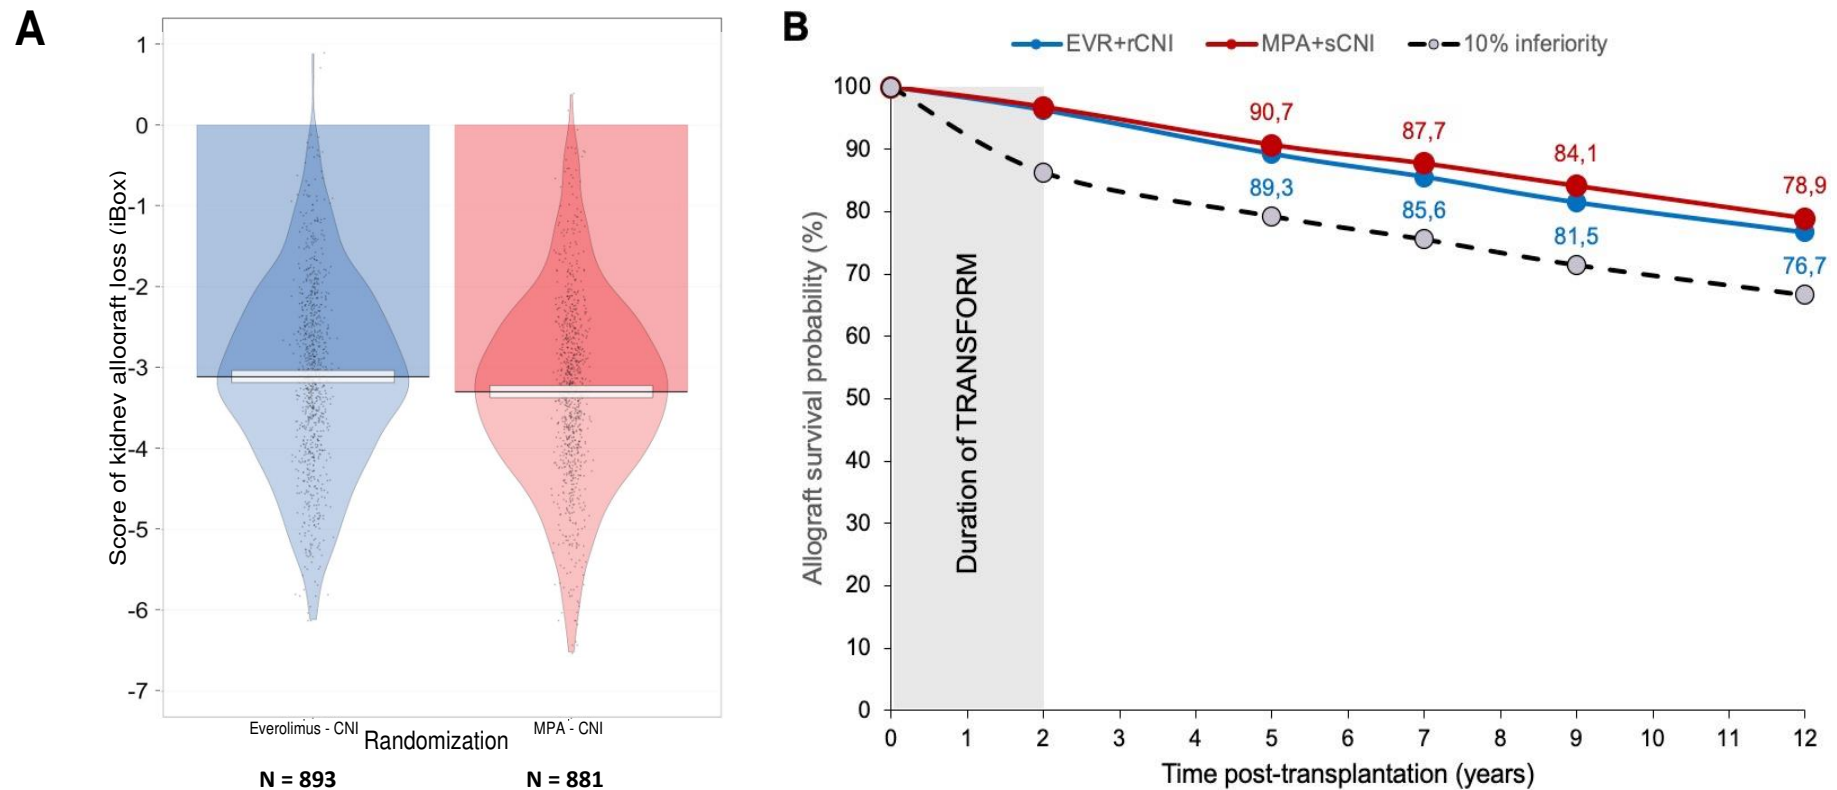



## List of Independent Ethics Committees (IECs) or Institutional Review Boards (IRBs) from the TRANSFORM study

| <b>Ethics Committee or Institutional Review Board</b>                                                           | <b>Department / Organization</b>          | <b>City, State/Province, Postal Code Country</b>                                                   |
|-----------------------------------------------------------------------------------------------------------------|-------------------------------------------|----------------------------------------------------------------------------------------------------|
| CIEIS Clínica Chutro S.R.L.                                                                                     | CIEIS Clínica Chutro S.R.L.               | Ciudad De Cordoba, Córdoba,(X5000EPU) Argentina                                                    |
| Comité Institucional De Ética De Investigación En Salud                                                         | Hospital Privado Centro Médico De Córdoba | Ciudad De Cordoba, Córdoba, (X5016KEH) Argentina                                                   |
| Comité De Ética Y Docencia Maipú - CEDIMA                                                                       | Diagnóstico Maipú                         | Vicente López, (B1602ABQ) Pcia. De Buenos Aires, Argentina                                         |
| Comité De Ética Para Ensayos En Farmacología Clínica, Fundación De Estudios Farmacológicos Y Medicamentos Fefym | NAP                                       | Ciudad Autónoma De Buenos Aires, (C1027AAP) Argentina                                              |
| Comité De Ética Para Ensayos En Farmacología Clínica, Fundación De Estudios Farmacológicos Y Medicamentos Fefym | NAP                                       | Ciudad Autónoma De Buenos Aires, (C1027AAP) Argentina                                              |
| Comité De Bioética – Fundación Favalaro                                                                         | Hospital Universitario Fundación Favalaro | Ciudad Autónoma De Buenos Aires, (C1078AAI) Argentina                                              |
| Comité De Ética De Protocolos De Investigación (CEPI)                                                           | Hospital Italiano De Buenos Aires         | Ciudad Autónoma De Buenos Aires, (C1199ABB) Argentina                                              |
| Sydney Local Health District Human Research Ethics Committee                                                    | Research Ethics And Governance Office     | Royal Prince Alfred Hospital, Camperdown NSW 2050 Australia                                        |
| Sydney Local Health District Human Research Ethics Committee                                                    | Research Ethics And Governance Office     | Royal Prince Alfred Hospital, Camperdown NSW 2050 Australia                                        |
| Sydney Local Health District Human Research Ethics Committee                                                    | Research Ethics And Governance Office     | Royal Prince Alfred Hospital, Camperdown NSW 2050 Australia                                        |
| Sir Charles Gairdner Group Human Research Ethics Committee                                                      | Research Ethics And Governance Office     | Sir Charles Gairdner Hospital, Level 2 A Block, Hospital Avenue, Nedlands WA 6009 Australia        |
| Sydney Local Health District Human Research Ethics Committee                                                    | Research Ethics And Governance Office     | Royal Prince Alfred Hospital, Camperdown NSW 2050 Australia                                        |
| Sir Charles Gairdner Group Human Research Ethics Committee                                                      | Research Ethics And Governance Office     | Sir Charles Gairdner Hospital, Level 2 A Block, Hospital Avenue, Nedlands WA 6009 Australia        |
| Sydney Local Health District Human Research Ethics Committee                                                    | Research Ethics And Governance Office     | Royal Prince Alfred Hospital, Camperdown NSW 2050 Australia                                        |
| Royal Adelaide Hospital Research Ethics Committee                                                               | Research Ethics And Governance Office     | Level 4, Women's Health Centre, Royal Adelaide Hospital, North Terrace, Adelaide SA 5000 Australia |
| Sydney Local Health District Human Research Ethics Committee                                                    | Research Ethics And Governance Office     | Royal Prince Alfred Hospital, Camperdown NSW 2050 Australia                                        |

| <b>Ethics Committee or Institutional Review Board</b>                                                                | <b>Department / Organization</b>                                                      | <b>City, State/Province, Postal Code Country</b>            |
|----------------------------------------------------------------------------------------------------------------------|---------------------------------------------------------------------------------------|-------------------------------------------------------------|
| Sydney Local Health District Human Research Ethics Committee                                                         | Research Ethics And Governance Office                                                 | Royal Prince Alfred Hospital, Camperdown NSW 2050 Australia |
| Ethikkommission Land Oberoesterreich                                                                                 | Kepler Universitaetsklinikum Neuromed Campus                                          | Linz, 4020 AUSTRIA                                          |
| Ethikkommission Land Oberoesterreich                                                                                 | Kepler Universitaetsklinikum Neuromed Campus                                          | Linz, 4020 AUSTRIA                                          |
| Ethische Commissie Onderzoek UZ/KU Leuven                                                                            |                                                                                       | Leuven, 3000 Belgium                                        |
| Comité Voor Medische Ethiek UZA/UA                                                                                   |                                                                                       | Edegem, 2650 Belgium                                        |
| Comité D'éthique Hospitalo-Facultaire Erasme-ULB                                                                     |                                                                                       | Brussels, 1070 Belgium                                      |
| Comité D'éthique Hospitalo-Facultaire Universitaire De Liège                                                         |                                                                                       | Liège, 4000 Belgium                                         |
| Comitê De Ética Em Pesquisa Da Universidade Federal De São Paulo (Unifesp) / Hospital São Paulo                      | Universidade Federal De São Paulo (Unifesp) / Hospital São Paulo                      | São Paulo/ Sp, Zipcode: 04023-061- Brazil                   |
| Comitê De Ética Em Pesquisa Do Hospital Das Clínicas Da Faculdade De Medicina Da Universidade De São Paulo – Hcfmusp | Hospital Das Clínicas Da Faculdade De Medicina Da Universidade De São Paulo – Hcfmusp | São Paulo/ Sp, 05403-010 - Brazil                           |
| Comitê De Ética Em Pesquisa Da Irmandade Da Santa Casa De Misericórdia De Porto Alegre                               | Irmandade Da Santa Casa De Misericórdia De Porto Alegre                               | Porto Alegre/Rs, 90020-090 - Brazil                         |
| Local Ethics Committee At UMHAT Aleksandrovskia EAD – Sofia                                                          | Local Ethics Committee At UMHAT Aleksandrovskia EAD – Sofia                           | 1 "Sveti Georgi Sofiiski" Str, Sofia 1431, Bulgaria         |
| Comité Ético Científico Del Servicio De Salud Metropolitano Sur Oriente.                                             |                                                                                       | Puente Alto, Santiago, Zip Code 820257, Chile               |
| Comite De Etica En Investigacion Clínica                                                                             | Fundación Cardioinfantil                                                              | Bogota DC, Cundinamarca, 11001, Colombia                    |
| Comite De Etica En Investigacion Biomedica                                                                           | Fundacion Valle Del Lili                                                              | Cali, Valle Del Cauca, 760031, Colombia                     |
| Središnje Etičko Povjerenstvo / Central Ethics Committee                                                             | N/A                                                                                   | Zagreb, 10000                                               |
| Središnje Etičko Povjerenstvo / Central Ethics Committee                                                             | N/A                                                                                   | Croatia                                                     |
| Središnje Etičko Povjerenstvo / Central Ethics Committee                                                             | N/A                                                                                   | Zagreb, 10000                                               |
| Etická Komise                                                                                                        | N/A                                                                                   | Pekařská 53, 602 00 Brno, Czech Republic                    |
| Medical Research Ethics Committee Mansoura University                                                                | Mansoura University                                                                   | Mansoura, PO Box. 35516, Egypt.                             |
| Comité De Protection Des Personnes Ile De France 2                                                                   | Hôpital Necker, 149 Rue De Sèvres, Carré Necker-Porte N2                              | Paris, 75743 Cedex 15, France                               |

| <b>Ethics Committee or Institutional Review Board</b>                                                                                                          | <b>Department / Organization</b>                                                                                                                                                            | <b>City, State/Province, Postal Code Country</b> |
|----------------------------------------------------------------------------------------------------------------------------------------------------------------|---------------------------------------------------------------------------------------------------------------------------------------------------------------------------------------------|--------------------------------------------------|
| Comité De Protection Des Personnes Ile De France 2                                                                                                             | Hôpital Necker, 149 Rue De Sèvres, Carré Necker-Porte N2                                                                                                                                    | Paris, 75743 Cedex 15, France                    |
| Comité De Protection Des Personnes Ile De France 2                                                                                                             | Hôpital Necker, 149 Rue De Sèvres, Carré Necker-Porte N2                                                                                                                                    | Paris, 75743 Cedex 15, France                    |
| Comité De Protection Des Personnes Ile De France 2                                                                                                             | Hôpital Necker, 149 Rue De Sèvres, Carré Necker-Porte N2                                                                                                                                    | Paris, 75743 Cedex 15, France                    |
| Comité De Protection Des Personnes Ile De France 2                                                                                                             | Hôpital Necker, 149 Rue De Sèvres, Carré Necker-Porte N2                                                                                                                                    | Paris, 75743 Cedex 15, France                    |
| Ethik-Kommission Der Medizinischen Fakultät Heidelberg                                                                                                         | Universitätsklinikum Heidelberg<br>Nierenzentrum Heidelberg                                                                                                                                 | Heidelberg, 69120, Germany                       |
| Ärzttekammer Niedersachsen<br>Ethik-Kommission                                                                                                                 | Nephrologisches Zentrum Niedersachsen                                                                                                                                                       | Hann. Münden, 34346, Germany                     |
| Landesärztekammer Rheinland-Pfalz<br>Ethik-Kommission                                                                                                          | Westpfalz-Klinikum Kaiserslautern<br>Medizinische Klinik III                                                                                                                                | Kaiserslautern, 67655, Germany                   |
| Universitätsklinikum Essen<br>Medizinische Fakultät Der Universität Duisburg-Essen<br>Ethik-Kommission                                                         | Universitätsklinikum Essen<br>Klinik Für Nephrologie                                                                                                                                        | Essen, 45122, Germany                            |
| Landesamt Für Gesundheit Und Soziales<br>Ethik-Kommission Des Landes Berlin                                                                                    | Universitätsklinik Charité - Campus Benjamin Franklin<br>Medizinische Klinik Mit Schwerpunkt Nephrologie                                                                                    | Berlin, 12203, Germany                           |
| Universität Witten/Herdecke<br>Ethik-Kommission                                                                                                                | Städtische Kliniken Merheim<br>Medizinische Klinik I<br>Transplantationszentrum                                                                                                             | Köln, 51109, Germany                             |
| Technische Universität München<br>Fakultät Für Medizin -<br>Ethikkommission                                                                                    | Klinikum Rechts Der Isar<br>Der TU München<br>Nephrologie                                                                                                                                   | München, 81675, Germany                          |
| Ludwig-Maximilians-Universität München<br>Klinikum Der Universität<br>Ethik-Kommission                                                                         | Klinikum Der Universität München<br>Campus Großhadern<br>Transplantationszentrum                                                                                                            | München, 81377, Germany                          |
| Ethik-Kommission An Der Medizinischen Fakultät Der Universität Leipzig<br>Ethikkommission An Der Universität Regensburg<br>Klinikum Der Universität Regensburg | Universitätsklinikum Leipzig<br>Operatives Department<br>Klinik Und Poliklinik Für Viszeral-, Transplantations-, Thorax- Und Gefäßchirurgie                                                 | Leipzig, 04103, Germany                          |
| Ethik-Kommission Der Medizinischen Hochschule Hannover                                                                                                         | Klinikum Der Universität Regensburg<br>Abteilung Für Nephrologie<br>Medizinische Hochschule Hannover<br>Zentrum Chirurgie<br>Klinik Für Allgemein-, Viszeral- Und Transplantationschirurgie | Regensburg, 93053, Germany                       |
|                                                                                                                                                                |                                                                                                                                                                                             | Hannover, 30625, Germany                         |

| <b>Ethics Committee or Institutional Review Board</b>                                                                              | <b>Department / Organization</b>                                                                                       | <b>City, State/Province, Postal Code Country</b>                                                                                                                                        |
|------------------------------------------------------------------------------------------------------------------------------------|------------------------------------------------------------------------------------------------------------------------|-----------------------------------------------------------------------------------------------------------------------------------------------------------------------------------------|
| Landesamt Für Gesundheit Und Soziales Ethik-Kommission Des Landes Berlin                                                           | Charité Universitätsmedizin Berlin<br>Campus Virchow<br>Klinik Für Allgemein-, Visceral- Und Transplantationschirurgie | Berlin, 13353, Germany                                                                                                                                                                  |
| National Ethics Committee                                                                                                          | N/A                                                                                                                    | Athens (Address: 284 Mesogeion Avenue, Cholargos), Attica, 15562, Greece                                                                                                                |
| National Ethics Committee                                                                                                          | N/A                                                                                                                    | Athens (Address: 284 Mesogeion Avenue, Cholargos), Attica, 15562, Greece                                                                                                                |
| National Ethics Committee                                                                                                          | N/A                                                                                                                    | Athens (Address: 284 Mesogeion Avenue, Cholargos), Attica, 15562, Greece                                                                                                                |
| National Ethics Committee                                                                                                          | N/A                                                                                                                    | Athens (Address: 284 Mesogeion Avenue, Cholargos), Attica, 15562, Greece                                                                                                                |
| Institutional Review Board                                                                                                         | Max Super Specialty Hospital, Unit Of Devki Devi Foundation) (A                                                        | Max Super Specialty Hospital, (A Unit Of Devki Devi Foundation) (East Block) 1, Press Enclave Road, Saket, New Delhi, 110017,                                                           |
| Institutional Ethics Committee, Institutional Review Board (IRB)<br>The Chairperson, Ethics Committee & Institutional Review Board | Columbia Asia Hospitals<br>Christian Medical College                                                                   | Columbia Asia Referral Hospital Yeshwanthpur, 26/1 Brigade Gateway, Malleshwaram W, Bangalore 560055                                                                                    |
| Institutional Review Board, Clinical Reserach Ethics Committee                                                                     | P.D.Hinduja Hospital & MRC                                                                                             | Christian Medical College, CMC Campus, Bagayam, Vellore - 632 002.<br>Room No.908, 9th Floor, Lalita Giridhar Building P.D.Hinduja Hospital & MRC, Veer Savarkar Marg, Mahim, Mumbai-16 |
| Rabin MC EC Comittee                                                                                                               | RABIN MC                                                                                                               | Petach Tikva, 49100, Israel                                                                                                                                                             |
| Souraski (Ichilov) MC EC Comittee                                                                                                  | Souraski MC (Ichilov)                                                                                                  | Tel Aviv 62239, Israel                                                                                                                                                                  |
| Comitato Etico Regione Toscana                                                                                                     |                                                                                                                        | Area Vasta Sud Est Presso Azienda Ospedaliera Universitaria Senese Di Siena<br>C/O Uoc Farmacia Aous - Viale Bracci 53100 Siena (Si)                                                    |
| Comitato Etico Per La Sperimentazione                                                                                              |                                                                                                                        | Clinica Della Provincia Di Padova Presso Aou Padova<br>Via Nicolo' Giustiniani, 2<br>35128 Padova (Pd)                                                                                  |
| Comitato Etico Milano                                                                                                              |                                                                                                                        | Area 3 C/O Asst Grande Ospedale Metropolitano<br>Niguarda Pad. 7 Ala D, 4° Piano<br>Piazza Dell' Ospedale Maggiore, 3<br>20162 Milano (Mi)                                              |
| Comitato Etico Indipendente                                                                                                        |                                                                                                                        | Presso La Fondazione Ptv Policlinico Tor Vergata Di Roma<br>Viale Oxford, 81<br>00133 Roma (Rm)                                                                                         |
| Comitato Etico Indipendente                                                                                                        |                                                                                                                        | Dell'azienda Ospedaliarouniversitaria Policlinico S.Orsola - Malpighi Di                                                                                                                |

| <b>Ethics Committee or Institutional Review Board</b>                                      | <b>Department / Organization</b>                                              | <b>City, State/Province, Postal Code Country</b>                                                                                      |
|--------------------------------------------------------------------------------------------|-------------------------------------------------------------------------------|---------------------------------------------------------------------------------------------------------------------------------------|
|                                                                                            |                                                                               | Bologna<br>Via Albertoni Pietro, 15 - Padiglione 3,<br>40138 Bologna (Bo)                                                             |
| Comitato Etico Interaziendale                                                              |                                                                               | A.O. Citta' Della Salute E Della<br>Scienza Di Torino<br>Corso Bramante, 88/90<br>10126 Torino (To)                                   |
| Comitato Etico                                                                             |                                                                               | Dell'universita' Cattolica Del S. Cuore -<br>Fondazione<br>Policlinico Gemelli<br>Largo Agostino Gemelli, 8<br>00168 Roma (Rm)        |
| Comitato Etico                                                                             |                                                                               | Interaziendale Dell'azienda Ospedaliera<br>Universitaria Maggiore Della Carita' Di<br>Novara<br>Corso Mazzini 18<br>28100 Novara (No) |
| Comitato Etico                                                                             |                                                                               | Dell'aoa Consorziale Policlinico Di Bari<br>Piazzale Giulio Cesare, 11<br>70124 Bari (Ba)                                             |
| Comitato Etico                                                                             |                                                                               | Per Parma C/O Azienda Ospedaliero-<br>Universitaria Di Parma<br>Via Gramsci, 11/14<br>43100 Parma (Pr)                                |
| Institutional Review Board For Japanese Red Cross Nagoya Daini Hospital                    | Japanese Red Cross Nagoya Daini Hospital                                      | Nagoya, Aichi, 466-8650<br>Japan                                                                                                      |
| Institutional Review Board For National Hospital Organization Chiba-East-Hospital          | National Hospital Organization Chiba-East-Hospital                            | Nagoya, Aichi, 466-8650<br>Japan                                                                                                      |
| Institutional Review Board For Fujita Health University Hospital                           | Fujita Health University Hospital                                             | Nagoya, Aichi, 466-8650<br>Japan                                                                                                      |
| Research Ethics Committee                                                                  | Prince Sultan Military Medical City                                           | PO 7897, Riyadh 11159, Saudi Arabia                                                                                                   |
| Institutional Review Board                                                                 | Research Center Department, King Faisal Specialist Hospital & Research Center | P.O.Box: 40047, Jeddah: 21499,<br>Kingdom Of Saudi Arabia                                                                             |
| Institutional Review Board                                                                 | Research Executive Administration ,King Fahad Specialist Hospital,            | Ammar Bin Thabit St, Al Muraikabat-<br>Dammam 32253, Saudi Arabia                                                                     |
| Ministry Of Health- The Standing Committee For Coordination Of Health And Medical Research | Hamad Al Essa Organ Transplant Center                                         | 22, Sabah Al-Salem Area;<br>P.O. Box: 569, Postal Code 44000<br>Kuwait                                                                |
| Hotel Dieu De France Ethics Committee                                                      | Ethics Committee Hotel Dieu De France                                         | Achrafieh, P.O. Box 16-6830, Beirut,<br>Lebanon                                                                                       |
| Hammoud Hospital University Medical Center - Institutional Review Board                    | Institutional Review Board Hammoud Hospital University Medical Center         | Ghassan Hammoud Street, P.O. Box<br>652, Saida Lebanon                                                                                |
| Hammoud Hospital University Medical Center - Institutional Review Board                    | Institutional Review Board Hammoud Hospital University Medical Center         | Ghassan Hammoud Street, P.O. Box<br>652, Saida Lebanon                                                                                |

| <b>Ethics Committee or Institutional Review Board</b>              | <b>Department / Organization</b>                                     | <b>City, State/Province, Postal Code Country</b>                                               |
|--------------------------------------------------------------------|----------------------------------------------------------------------|------------------------------------------------------------------------------------------------|
| Medical Research & Ethics Committee                                | Ministry Of Health Malaysia<br>C/O Institute For Health Management   | Kuala Lumpur, 59000<br>Malaysia                                                                |
| Medical Research & Ethics Committee                                | Ministry Of Health Malaysia<br>C/O Institute For Health Management   | Kuala Lumpur, 59000<br>Malaysia                                                                |
| Centro Hospitalario Vicor, S.A De C.V.                             | NA                                                                   | Guadalajara., Jalisco; 44520, Mexico                                                           |
| Medisch Ethische Toetsingscommissie                                | Leids Universitair Medisch Centrum (LUMC)<br>Secretariaat CME (H1-Q) | Postbus 9600<br>2300 RC Leiden,<br>The Netherlands                                             |
| Medisch Ethische Toetsingscommissie                                | Leids Universitair Medisch Centrum (LUMC)<br>Secretariaat CME (H1-Q) | Postbus 9600<br>2300 RC Leiden,<br>The Netherlands                                             |
| Medisch Ethische Toetsingscommissie                                | Leids Universitair Medisch Centrum (LUMC)<br>Secretariaat CME (H1-Q) | Postbus 9600<br>2300 RC Leiden,<br>The Netherlands                                             |
| Medisch Ethische Toetsingscommissie                                | Leids Universitair Medisch Centrum (LUMC)<br>Secretariaat CME (H1-Q) | Postbus 9600<br>2300 RC Leiden,<br>The Netherlands                                             |
| Medisch Ethische Toetsingscommissie                                | Leids Universitair Medisch Centrum (LUMC)<br>Secretariaat CME (H1-Q) | Postbus 9600<br>2300 RC Leiden,<br>The Netherlands                                             |
| Medisch Ethische Toetsingscommissie                                | Leids Universitair Medisch Centrum (LUMC)<br>Secretariaat CME (H1-Q) | Postbus 9600<br>2300 RC Leiden,<br>The Netherlands                                             |
| REK-Regional Committees For Medical And Health Research Ethics     | REK Sør-Øst D                                                        | Gullhaugveien 1-3, 0484 Oslo, Norway<br>Postbox: Postboks 1130, Blindern,<br>0318 Oslo, Norway |
| National Kidney And Transplant Institute Research Ethics Committee | National Kidney And Transplant Institute                             | Quezon City, 1101 Philippines                                                                  |
| National Kidney And Transplant Institute Research Ethics Committee | National Kidney And Transplant Institute                             | Quezon City, 1101 Philippines                                                                  |
| Komisja Bioetyczna PUM                                             |                                                                      | Ul. Rybacka 1<br>70-204 Szczecin"                                                              |
| Komisja Bioetyczna PUM                                             |                                                                      | Ul. Rybacka 1<br>70-204 Szczecin"                                                              |
| Komisja Bioetyczna PUM                                             |                                                                      | Ul. Rybacka 1<br>70-204 Szczecin"                                                              |
| Komisja Bioetyczna PUM                                             |                                                                      | Ul. Rybacka 1<br>70-204 Szczecin"                                                              |
| Comissão De Ética Para A Investigação Clínica                      | NA                                                                   | 1749-004 Lisboa<br>Portugal                                                                    |
| Comissão De Ética Para A Investigação Clínica                      | NA                                                                   | 1749-004 Lisboa<br>Portugal                                                                    |
| Comissão De Ética Para A Investigação Clínica                      | NA                                                                   | 1749-004 Lisboa<br>Portugal                                                                    |
| Comissão De Ética Para A Investigação Clínica                      | NA                                                                   | 1749-004 Lisboa<br>Portugal                                                                    |
| Comissão De Ética Para A Investigação Clínica                      | NA                                                                   | 1749-004 Lisboa<br>Portugal                                                                    |
| LEC Of Federal Research Center Of Transplantology                  | Federal Research Center Of Transplantology And Artificial            | Moscow, 123182,<br>Russia                                                                      |

| <b>Ethics Committee or Institutional Review Board</b>                                                          | <b>Department / Organization</b>                                                                          | <b>City, State/Province, Postal Code Country</b>                     |
|----------------------------------------------------------------------------------------------------------------|-----------------------------------------------------------------------------------------------------------|----------------------------------------------------------------------|
| And Artificial Organs N.A. Academician V.I. Shumakova                                                          | Organs N.A. Academician V.I. Shumakova                                                                    |                                                                      |
| LEC Of Scientific-Research Institute Of Emergency Care Named NV Sklifosofskiy                                  | Scientific-Research Institute Of Emergency Care Named NV Sklifosofskiy                                    | Moscow, 129090, Russia                                               |
| LEC Of Volgograd Regional Uronephrology Center                                                                 | Volgograd Regional Uronephrology Center                                                                   | Volzhskiy, Volgograd Region, 404120, Russia                          |
| Local Ethics Committee Of Privolzhskiy Regional Medical Centre Of Federal Medical And Biology Agency Of Russia | Privolzhskiy Regional Medical Centre Of Federal Medical And Biology Agency Of Russia                      | 2, Nizhne- Volzhskaya Naberezhnaya, 603001, Nizhniy Novgorod, Russia |
| LEC Of Sverdlovsk Regional Clinical Hospital # 1                                                               | Sverdlovsk Regional Clinical Hospital # 1                                                                 | Ekaterinburg, 620102, Russia                                         |
| LEC Of Scientific And Research Institution - Clinic Hospital № 1 Named After Professor S.V. Ochapovski”        | Scientific And Research Institution - Clinic Hospital № 1 Named After Professor S.V. Ochapovski”          | Krasnodar, 350086, Russia                                            |
| Ethics Committee Of Military Medical Academy                                                                   | Military Medical Academy – Center For Organ Transplantation                                               | Belgrade, 11000 Serbia                                               |
| Ethics Committee Of Military Medical Academy                                                                   | Military Medical Academy – Center For Organ Transplantation                                               | Belgrade, 11000 Serbia                                               |
| Ethics Committee Of Military Medical Academy                                                                   | Military Medical Academy – Center For Organ Transplantation                                               | Belgrade, 11000 Serbia                                               |
| Centralised Institutional Review Board                                                                         | Domain E                                                                                                  | Singapore, Singapore 150168                                          |
| Etická Komisia UN L. Pasteura Košice Rastislavova 43 041 90 Košice                                             | UN L. Pasteura Košice Transplantačné Pracovisko I.Chirurgickej Kliniky                                    | Trieda SNP 1 041 66 Košice                                           |
| Etická Komisia FnsP F.D.Roosevelta Nám. L.Svobodu 1 975 17 Banská Bystrica                                     | FnsP F.D.Roosevelta Nefrologicko - Transplantačné Oddelenie                                               | Nám. L.Svobodu 1 975 17 Banská Bystrica                              |
| Etická Komisia UN Bratislava Nemocnica Ak. L. Déreza Limbová 5 833 05 Bratislava                               | UN Bratislava Nemocnica Ak. L. Déreza Urologická Klinika LFUK A SZU S Centrom Pre Transplantácie Obličiek | Limbová 5 833 05 Bratislava                                          |
| Etická Komisia Univerzitnej Nemocnice Martin Transplantačné Centrum Kollárova 2 036 59 Martin                  | Univerzitná Nemocnica Martin Klinika Transplantačnej A Cievnej Chirurgie                                  | Kollárova 2 036 59 Martin                                            |
| National Medical Ethics Committee                                                                              | Ministry Of Health                                                                                        | 1000 Ljubljana, Slovenia                                             |

| <b>Ethics Committee or Institutional Review Board</b>   | <b>Department / Organization</b>          | <b>City, State/Province, Postal Code Country</b>                                           |
|---------------------------------------------------------|-------------------------------------------|--------------------------------------------------------------------------------------------|
| University Of Cape Town Human Research Ethics Committee | Faculty Of Health Sciences                | Cape Town, Western Cape 7925                                                               |
| Institutional Review Board                              | Asan Medical Center                       | Seoul 88, Olympic-Ro 43-Gil, Songpa-Gu, 05505, Korea                                       |
| Institutional Review Board                              | Yonsei University Health System           | Seoul, 250, Seongsanno(134 Sinchon-Dong), Seodaemun-Gu, 03722, Korea                       |
| Institutional Review Board                              | Samsung Medical Center                    | Seoul, 81, Irwollo, Gangnam-Gu, 06351, Korea                                               |
| Comité Ético De Investigación Clínica Parc De Salut MAR | Hospital Del Mar – CEIC Parc De Salut Mar | C/ Dr. Aiguader, 88 08003 Barcelona                                                        |
| Comité Ético De Investigación Clínica Parc De Salut MAR | Hospital Del Mar – CEIC Parc De Salut Mar | C/ Dr. Aiguader, 88 08003 Barcelona                                                        |
| Comité Ético De Investigación Clínica Parc De Salut MAR | Hospital Del Mar – CEIC Parc De Salut Mar | C/ Dr. Aiguader, 88 08003 Barcelona                                                        |
| Comité Ético De Investigación Clínica Parc De Salut MAR | Hospital Del Mar – CEIC Parc De Salut Mar | C/ Dr. Aiguader, 88 08003 Barcelona                                                        |
| Comité Ético De Investigación Clínica Parc De Salut MAR | Hospital Del Mar – CEIC Parc De Salut Mar | C/ Dr. Aiguader, 88 08003 Barcelona                                                        |
| Comité Ético De Investigación Clínica Parc De Salut MAR | Hospital Del Mar – CEIC Parc De Salut Mar | C/ Dr. Aiguader, 88 08003 Barcelona                                                        |
| Comité Ético De Investigación Clínica Parc De Salut MAR | Hospital Del Mar – CEIC Parc De Salut Mar | C/ Dr. Aiguader, 88 08003 Barcelona                                                        |
| Comité Ético De Investigación Clínica Parc De Salut MAR | Hospital Del Mar – CEIC Parc De Salut Mar | C/ Dr. Aiguader, 88 08003 Barcelona                                                        |
| Comité Ético De Investigación Clínica Parc De Salut MAR | Hospital Del Mar – CEIC Parc De Salut Mar | C/ Dr. Aiguader, 88 08003 Barcelona                                                        |
| Comité Ético De Investigación Clínica Parc De Salut MAR | Hospital Del Mar – CEIC Parc De Salut Mar | C/ Dr. Aiguader, 88 08003 Barcelona                                                        |
| Regionala Etikprövningsnämnden I Stockholm              |                                           | Karolinska Institutet I Solna Widerströmska Huset Tomtebodavägen 18A, 171 65 Solna, Sweden |
| Regionala Etikprövningsnämnden I Stockholm              |                                           | Karolinska Institutet I Solna Widerströmska Huset Tomtebodavägen 18A, 171 65 Solna, Sweden |
| Regionala Etikprövningsnämnden I Stockholm              |                                           | Karolinska Institutet I Solna Widerströmska Huset Tomtebodavägen 18A, 171 65 Solna, Sweden |
| Kantonale Ethikkommission Bern                          |                                           | Bern, 3010, Switzerland                                                                    |
| Research Ethics Committee                               | National Taiwan University Hospital       | Taipei, 10048 Taiwan                                                                       |
| Institutional Review Board                              | Taichung Veterans General Hospital        | Taichung, 40705 Taiwan                                                                     |
| Institutional Review Board                              | National Cheng Kung University Hospital   | Tainan, 70403 Taiwan                                                                       |



| <b>Ethics Committee or Institutional Review Board</b>         | <b>Department / Organization</b>                                                                                           | <b>City, State/Province, Postal Code Country</b>                                                            |
|---------------------------------------------------------------|----------------------------------------------------------------------------------------------------------------------------|-------------------------------------------------------------------------------------------------------------|
| PMK                                                           | Institutional Review Board<br>Royal Thai Army Medical<br>Department                                                        | Royal Thai Army Medical Department,<br>Phramongkutklao Hospital.                                            |
| Rajavithi                                                     | Ethics Committees On<br>Researches Involving Human<br>Subjects Rajavithi Hospital                                          | Rajavithi Hospital                                                                                          |
| RAMA                                                          | Ethical Clearance Committee<br>On Human Right Related To<br>Researches Involving Human<br>Subjects Faculty Of<br>Medicine, | Ramathibodi Hospital, Mahidol<br>University                                                                 |
| Clinical Research Ethics<br>Committee                         | T.C. Istanbul University<br>Istanbul Faculty Of Medicine,                                                                  | Istanbul University Istanbul Faculty Of<br>Medicine<br>Fatih / Çapa Istanbul 34093, Turkey                  |
| Clinical Research Ethics<br>Committee                         | T.C. Istanbul University<br>Istanbul Faculty Of Medicine,                                                                  | Istanbul University Istanbul Faculty Of<br>Medicine<br>Fatih / Çapa Istanbul 34093, Turkey                  |
| Clinical Research Ethics<br>Committee                         | T.C. Istanbul University<br>Istanbul Faculty Of Medicine,                                                                  | Istanbul University Istanbul Faculty Of<br>Medicine<br>Fatih / Çapa Istanbul 34093, Turkey                  |
| Western Institutional<br>Review Board                         |                                                                                                                            | 1019 39th Avenue SE Suite 120<br>Puyallup, WA 98374-2115                                                    |
| Institutional Review Board                                    | Porter Adventist Hospital                                                                                                  | Joint IRB Office, 2525 South Downing<br>Street, Denver, Colorado 80210-5876                                 |
| Institutional Review Board                                    | The University Of Utah                                                                                                     | 75 South 2000 East Salt Lake City, UT<br>84112                                                              |
| Institutional Review Board                                    | The University Of Texas                                                                                                    | 6410 Fannin Street, Suite 1100,<br>Houston, Texas 77030                                                     |
| Institutional Review Board                                    | Baylor Research Institute                                                                                                  | 3310 Live Oak, Suite 501- Dallas, TX<br>75204                                                               |
| Institutional Review Board                                    | Baylor Research Institute                                                                                                  | 3310 Live Oak, Suite 501- Dallas, TX<br>75204                                                               |
| Institutional Review Board                                    | Houston Methodist Research<br>Institute                                                                                    | 6670 Bertner Houston, TX 77030                                                                              |
| Institutional Review Board<br>For Health Sciences<br>Research | Universty Of Verginia                                                                                                      | PO Box 800483, Charlottesville, VA<br>22908                                                                 |
| Institutional Review Board                                    | Washington University                                                                                                      | 660 South Euclid Ave., Campus Box<br>8089, St Louis                                                         |
| Cedars-Sinai Institutional<br>Review Board                    |                                                                                                                            | 8383 Wilshire Blvd Suite 742, Beverly<br>Hills,<br>CA 90211                                                 |
| Institutional Review Board                                    | University Of Sothern<br>California Health Sciences                                                                        | LAC+USC Medical Center , General<br>Hospital Suite 4700, 1200 North State<br>Street, Los Angeles, CA 90033  |
| Institutional Review Board                                    | Baylor College Of Medicine                                                                                                 | One Baylor Plaza, 600D, Houston ,<br>Texas 77030                                                            |
| Institutional Review Board                                    |                                                                                                                            | 1019 39th Avenue SE Suite 120<br>Puyallup, WA 98374-2115                                                    |
| Institutional Review Board                                    | University Of Maryland,<br>Baltimore                                                                                       | Human Research Protections Office<br>Biopark I<br>800 W. Baltimore Street, Suite 100<br>Baltimore, MD 21201 |
| Institutional Review Board                                    | Lahey Hospital And Medical<br>Center                                                                                       | 41 Mall Road, Burlington, MA 01805                                                                          |
| Institutional Review Board                                    | Saint Barnabas Medical<br>Center                                                                                           | 94 Old Short Hills Road, Livingston, NJ<br>07039                                                            |
| COMMITTEE ON<br>CLINICAL Lnvestigations                       | Beth Israel Deaconess<br>Medical Center                                                                                    | 330 Brookline Ave.<br>Boston, MA 02215                                                                      |

| <b>Ethics Committee or Institutional Review Board</b> | <b>Department / Organization</b>                                             | <b>City, State/Province, Postal Code Country</b>                                                               |
|-------------------------------------------------------|------------------------------------------------------------------------------|----------------------------------------------------------------------------------------------------------------|
| Institutional Review Board                            |                                                                              | CORO West, Suite 1.300<br>One Hoppin Street<br>Providence, RI 02903                                            |
| Institutional Review Board                            | DUHS Institutional Review Board                                              | 2424 Erwin Road, Suite 405, Durham, NC                                                                         |
| Institutional Review Board                            | Partners Human Research Committee                                            | 399 Revolution Drive, Suite 710<br>Somerville, MA 02145                                                        |
| Institutional Review Board                            | DUHS Institutional Review Board                                              | 2424 Erwin Road, Suite 405, Durham, NC                                                                         |
| Institutional Review Board                            | Pinnacle Health Institutional Review Board                                   | Bloom Outpatient Center Suite 109,<br>4310 Londonderry Road, Harrisburg<br>PA 17109                            |
| Institutional Review Board                            | Medical College Of Wisconsin / Froedtert Hospital                            | 8701 Watertown Plank Road<br>Milwaukee, WI 53226-0509                                                          |
| Institutional Review Board                            | Medical School Institutional Review Board                                    | 2800 Plymouth Road, Building 520,<br>Room 3214, Ann Arbor MI 48109-2800                                        |
| Institutional Review Board                            | University Of Illinois At Chicago                                            | 203 Administrative Office Building<br>1737 N Kst Polk Street<br>Chicago, Illinois 60612-7227                   |
| Institutional Review Board                            |                                                                              | CFP-Basement 046<br>2799 West Grand Boulevard<br>Detroit, MI 48202-2689                                        |
| Institutional Review Board                            | Western Institutional Review Board                                           | 1019 39th Avenue SE Suite 120<br>Puyallup, WA 98374-2115                                                       |
| Institutional Review Board                            |                                                                              | Medical Center Boulevard, Winston-Salem, NC 27157-1023                                                         |
| Institutional Review Board                            | University Of California                                                     | 2921 Stockton Blvd., Suite 1400<br>Sacramento, CA 95817                                                        |
| Institutional Review Board                            | Western Institutional Review Board                                           | 1019 39th Avenue SE Suite 120  <br>Puyallup, WA 98374-2115                                                     |
| Institutional Review Board                            |                                                                              | Medical School Building 52<br>Mason Farm Road<br>CB #7097<br>Chapel Hill, NC 27599-7097                        |
| Institutional Review Board                            | University Of California, San Francisco                                      | Human Research Protection Program,<br>Box 0962<br>3333 California Street, Suite 315<br>San Francisco, CA 94143 |
| Local Institutional Review Board                      | Biomedical Research Alliance Of New York Institutional Review Board          | 1981, Marcus Avenue, Suite 210, Lake Success, NY 11042                                                         |
| Institutional Review Board                            | Western Institutional Review Boards                                          | 1019, 39th Avenue SE Suite 120,<br>Puyallup, WA 98374-2115                                                     |
| Local Institutional Review Board                      | Vanderbilt University, Institutional Review Board                            | 504, Oxford House, Nashville,<br>Tennessee, 37232-4315                                                         |
| Institutional Review Board                            | University Of Buffalo, The State University Of New York, Health Sciences IRB | 150, Parker Hall, Buffalo, NY 14214-8004                                                                       |
| Institutional Review Board                            | Sharp Healthcare Institutional Review Board                                  | 8695, Spectrum Center Blvd, San Diego, CA 92123                                                                |
| Institutional Review Board                            | Cleveland Clinic IRB                                                         | OS-1, Cleveland Clinic, 9500 Euclid Avenue, Cleveland, OH 44195                                                |
| Institutional Review Board                            | University Hospitals Case Medical Centre                                     | Institutional Review Board For Human Investigation, 11100 Euclid Avenue, Lakeside 1400, Cleveland, Ohio 44106  |
| Institutional Review Board                            | Loma Linda Institutional Review Board                                        | 24887, Taylor Street, Suite 202, Loma Linda, CA 92350                                                          |
